# Supplementary material for: Telomere Dynamics Throughout Spermatogenesis
Source: PubMed Central journal article supplement (PMC6678359; doi:10.3390/genes10070525), 2019-07-12
Supplement: genes-10-00525-s001.pdf [file genes-10-00525-s001.pdf]

**Table S1.** Relative Telomere Length qPCR Primers

| <b>Repeat Region</b> | <b>Forward Primer</b>                         | <b>Reverse Primer</b>                       |
|----------------------|-----------------------------------------------|---------------------------------------------|
| Telo                 | CGGTTTGGTTTGGGTTTGGGTTTGG<br>GGTTTGGGTTTGGGTT | GGCTTGCCTTACCCTTACCCTTACCCTTAC<br>CCTTACCCT |
| 36B4                 | CGACCTGGAAGTCCAACACTAC                        | ATCTGCTGCATCTGCTTG                          |

**Table S2.** Relative Telomere Length qPCR Oligomer Standard Sequences

| <b>Standard</b> | <b>Oligomer Sequence</b>                                                                                                   |
|-----------------|----------------------------------------------------------------------------------------------------------------------------|
| Telomere        | (TTAGGG) <sup>14</sup>                                                                                                     |
| 36B4            | CGACCTGGAAGTCCAACACTACTTCCTTAAGATCAT<br>CCAACCTTTGGATGACTACCCAAAATGCTTCATT<br>GTGGGAGCAGACAATGTGGGCTCCAAGCAGATG<br>CAGCAGA |
